# Supplementary material for: Mycobacteria activate γδ T-cell anti-tumour responses via cytokines from type 1 myeloid dendritic cells: a mechanism of action for cancer immunotherapy
Source: Springer Nature journal article supplement (doi:10.1007/s00262-011-1121-4), 2011-10-14
Supplement: MOESM1 [file 262_2011_1121_MOESM1_ESM.pdf]

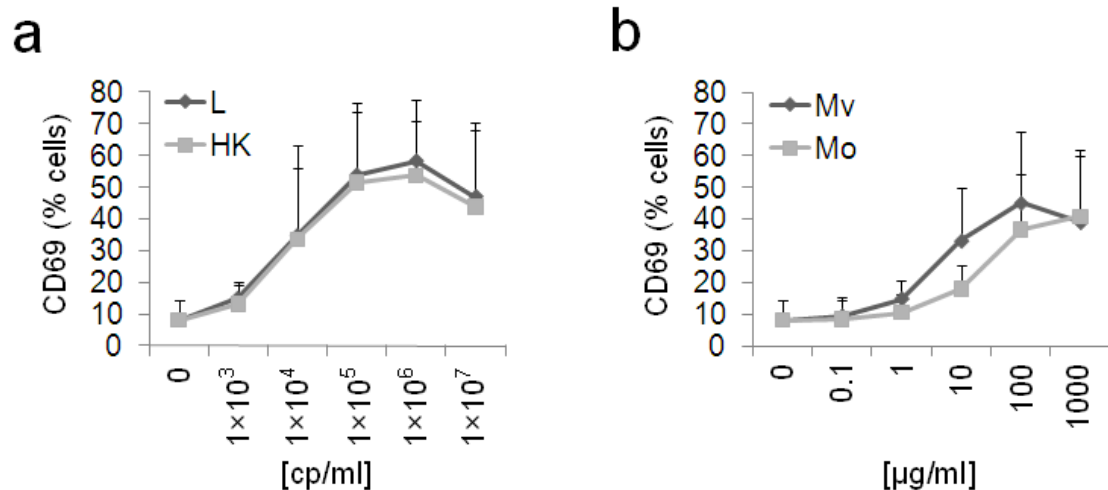

**Supplementary figure 1: Dose titration curve of BCG-, *M.vaccae*- and *M.obuense*-induced CD69 expression on  $\gamma\delta$  T-cells**

PBMCs were cultured overnight with different doses of BCG, *M.vaccae* (Mv) and *M.obuense* (Mo) prior to flow cytometric analysis of CD69 on gated  $\gamma\delta$  T-cells. Untreated (un) cells were used as a negative control. a) Mean of n=4 for CD69 expression on  $\gamma\delta$  T-cells in response to live (L) and heat-killed (HK) BCG. Concentrations are culturable particles (cp) per ml. b) Mean of n=5 for CD69 expression on  $\gamma\delta$  T-cells in response to Mv and Mo. Error bars represent standard deviations.
